# Supplementary material for: Cooperation Between the Septins and the Actomyosin Ring and Role of a Cell-Integrity Pathway During Cell Division in Fission Yeast
Source: Oxford University Press journal article supplement (doi:10.1534/genetics.110.119842), 2010-08-27
Supplement: 119842_si.pdf [file 119842_si.pdf]

# GENETICS

## Supporting Information

<http://www.genetics.org/cgi/content/full/genetics.110.119842/DC1>

### **Cooperation Between the Septins and the Actomyosin Ring and Role of a Cell-Integrity Pathway During Cell Division in Fission Yeast**

**Jian-Qiu Wu, Yanfang Ye, Ning Wang, Thomas D. Pollard and John R. Pringle**

Copyright © 2010 by the Genetics Society of America  
DOI: 10.1534/genetics.110.119842

**FILES S1-S9****Supporting Movies**

Files S1-S9 are available for download as .mov files at <http://www.genetics.org/cgi/content/full/genetics.110.119842/DC1>.

File S1: Cell-lysis phenotype during cell separation in *s34 spn1Δ* strain.

File S2: Septin independence of Rho-GEF Rgf3 localization to the division site. DIC and GFP images of *rgf3-GFP spn1Δ* cells are shown.

File S3: Cell-separation defect in an *ng124 spn1Δ* double mutant.

File S4: Normal septin localization and variable cell-separation delay in an *ng124 spn4-GFP* mutant.

File S5: Localization of Spn1-GFP in wild-type strain.

File S6: Localization of Spn4-GFP in *scw1-ng124* strain.

File S7: Localization of Mid2-GFP in wild-type strain.

File S8: Localization of Spn1-GFP in *mid2* deletion strain.

File S9: Localization of Mid2-GFP in *scw1-ng124* strain.
